# Supplementary material
Source: ML conference proceedings conference paper supplement (https://openaccess.thecvf.com/content/CVPR2023/html/Park_All-in-One_Image_Restoration_CVPR_2023_paper.html)
Supplement: Supplementary file 1 [file Park_All-in-One_Image_Restoration_CVPR_2023_supplemental.pdf]

# Supplementary Material

## All-in-one Image Restoration for Unknown Degradations Using Adaptive Discriminative Filters for Specific Degradations

Dongwon Park<sup>1,4</sup>, Byung Hyun Lee<sup>2</sup>, Se Young Chun<sup>1,2,3,†</sup>

<sup>1</sup>INMC, <sup>2</sup>Dept. of ECE, <sup>3</sup>IPAI, Seoul National University, Republic of Korea

<sup>4</sup>Dept. of EE, UNIST, Republic of Korea

{dong1park, ldlqudus756, sychun}@snu.ac.kr

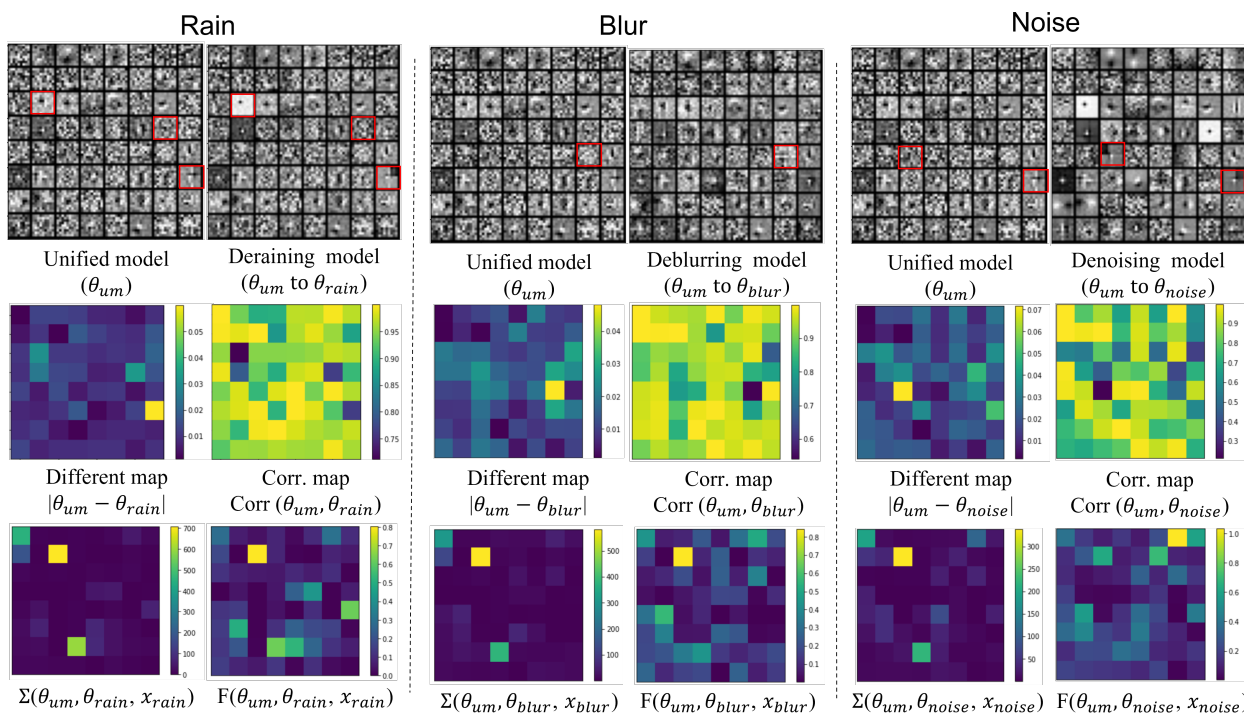

Figure 1. Visualization of convolutional filters in UM for Rain-Noise-Blur and IM for Rain, Blur, Noise where IM was fine-tuned from UM with the difference, correlation map,  $\Sigma$  map and FAIG-SD map ( $F$ ) between them.  $\Sigma(\theta_{um}, \theta_d, x)$  map is  $\sum_{t=0}^{N-1} \mathcal{L}(\lambda(\alpha_t), x) / \lambda(\alpha_t)$ , where  $\lambda(\alpha) = \alpha\theta_{ab} + (1 - \alpha)\theta_{ta}$ . It was observed that the FAIG value differed depending on the task.

### 1. Kernel Analysis for Toy Experiment Using UM vs. IM

Figure 1 illustrates convolutional filters from the first layer of UM and IM for Rain-Noise-Blur task. The UM is shared for all cases and fine-tuned for Rain, Blur, and

Noise tasks separately to generate IMs for each task. In all degradation cases, we consistently observed that only a small number of filters has changed by fine-tuning for a specific degradation from UM. We observed that  $\Sigma$  map was similar, and also observed that the FAIG-SD map changed depending on the task.

†Corresponding author.

Table 1. Performance comparisons among different filter location selections for  $M$  in our CNN with ADS in LPIPS [7]: Random selection method (Ran), Encoder selection method (En),  $|\theta - \hat{\theta}|$  selection method ( $|\theta|$ ) and our FAIG-SD method (Ours) on Rain-Noise-Blur test dataset.

| Added | Added 5% filters             |       |            |              | Added 3% filters              |       |            |              | Added 1% filters              |       |            |              | Base  |
|-------|------------------------------|-------|------------|--------------|-------------------------------|-------|------------|--------------|-------------------------------|-------|------------|--------------|-------|
| Task  | Ran                          | En    | $ \theta $ | <b>Ours</b>  | Ran                           | En    | $ \theta $ | <b>Ours</b>  | Ran                           | En    | $ \theta $ | <b>Ours</b>  | UM    |
| Rain  | 0.271                        | 0.260 | 0.253      | <b>0.230</b> | 0.273                         | 0.264 | 0.260      | <b>0.234</b> | 0.277                         | 0.273 | 0.268      | <b>0.246</b> | 0.279 |
| Noise | 0.138                        | 0.133 | 0.131      | <b>0.128</b> | 0.140                         | 0.136 | 0.133      | <b>0.130</b> | 0.141                         | 0.137 | 0.136      | <b>0.133</b> | 0.142 |
| Blur  | 0.201                        | 0.197 | 0.194      | <b>0.191</b> | 0.202                         | 0.200 | 0.197      | <b>0.193</b> | 0.204                         | 0.201 | 0.200      | <b>0.199</b> | 0.204 |
| Avg.  | 0.203                        | 0.196 | 0.193      | <b>0.183</b> | 0.205                         | 0.200 | 0.197      | <b>0.186</b> | 0.207                         | 0.204 | 0.201      | <b>0.193</b> | 0.208 |
| Par.  | 33.0 M = 28.7M $\times$ 1.15 |       |            |              | 31.3 M = 28.7 M $\times$ 1.09 |       |            |              | 29.6 M = 28.7 M $\times$ 1.03 |       |            |              | 28.7  |

## 2. Experimental setups

Our experimental environment is the same as that of Chen *et al.* [2]. In order to discover the discriminative filter, we need to train a unified model and independent models for each task. All models were trained with 39,000 iterations and a warm-up strategy. The initial learning rate was  $2 \times 10^{-4}$  and the ADAM optimizer [4] with batch size of 32 was used to train. We used the cosine annealing learning rate decay technique with  $\eta_{min}$  equal to  $1 \times 10^{-6}$ . For fair comparison, the proposed method was evaluated on the same machine with NVIDIA A100 GPU using PyTorch [6]. The patch size was set to  $224 \times 224$  and data augmentation for training such as random crop, horizontal flip, and 90-degree rotation were used. We adopt an architecture similar to MSBDN [3], just like Chen [2] and NAFNet [1] architectures, which has the state-of-the-art performance in IM based image restoration. We used the official codes of Airnet [5] and Chen [2] that were published by the original authors. we used an architecture similar to those of MSBDN, Chen, and NAFNet, which have state-of-the-art performance in IM-based image restoration was implemented in published code by the author. We conducted an experiment based on the MSBDN [3] network used by Chen [2] and NAFNet [1], which is the state-of-the-art result in IM-based image restoration.

## 3. More comparison studies for different mask selection in LPIPS

Table 1 summarizes the performance in LPIPS [7] and the number of parameters. Our method yielded substantially higher performance than other methods, demonstrating the effectiveness of selecting discriminative filters for each task in LPIPS [7] as well.

## 4. More Figures for Qualitative Results

Figures from 2 to 5 illustrate the qualitative results of the baseline methods and the prior arts (UM, Chen, AirNet) and our approach evaluated on the Rain-Noise-Blur and Rain-Snow-Haze. Compared to the prior arts, our proposed method consistently yielded visually well-restored images

by alleviating the degradations.

## References

- [1] Liangyu Chen, Xiaojie Chu, Xiangyu Zhang, and Jian Sun. Simple baselines for image restoration. *ECCV*, 2022. 2
- [2] Wei-Ting Chen, Zhi-Kai Huang, Cheng-Che Tsai, Hao-Hsiang Yang, Jian-Jiun Ding, and Sy-Yen Kuo. Learning multiple adverse weather removal via two-stage knowledge learning and multi-contrastive regularization: Toward a unified model. In *CVPR*, 2022. 2
- [3] Hang Dong, Jinshan Pan, Lei Xiang, Zhe Hu, Xinyi Zhang, Fei Wang, and Ming-Hsuan Yang. Multi-scale boosted dehazing network with dense feature fusion. In *CVPR*, 2020. 2
- [4] Diederik P Kingma and Jimmy Ba. Adam: A method for stochastic optimization. *ICLR*, 2015. 2
- [5] Boyun Li, Xiao Liu, Peng Hu, Zhongqin Wu, Jiancheng Lv, and Xi Peng. All-in-one image restoration for unknown corruption. In *CVPR*, 2022. 2
- [6] Adam Paszke, Sam Gross, Francisco Massa, Adam Lerer, James Bradbury, Gregory Chanan, Trevor Killeen, Zeming Lin, Natalia Gimelshein, Luca Antiga, et al. PyTorch: An imperative style, high-performance deep learning library. In *NeurIPS*, 2019. 2
- [7] Richard Zhang, Phillip Isola, Alexei A Efros, Eli Shechtman, and Oliver Wang. The unreasonable effectiveness of deep features as a perceptual metric. In *CVPR*, 2018. 2

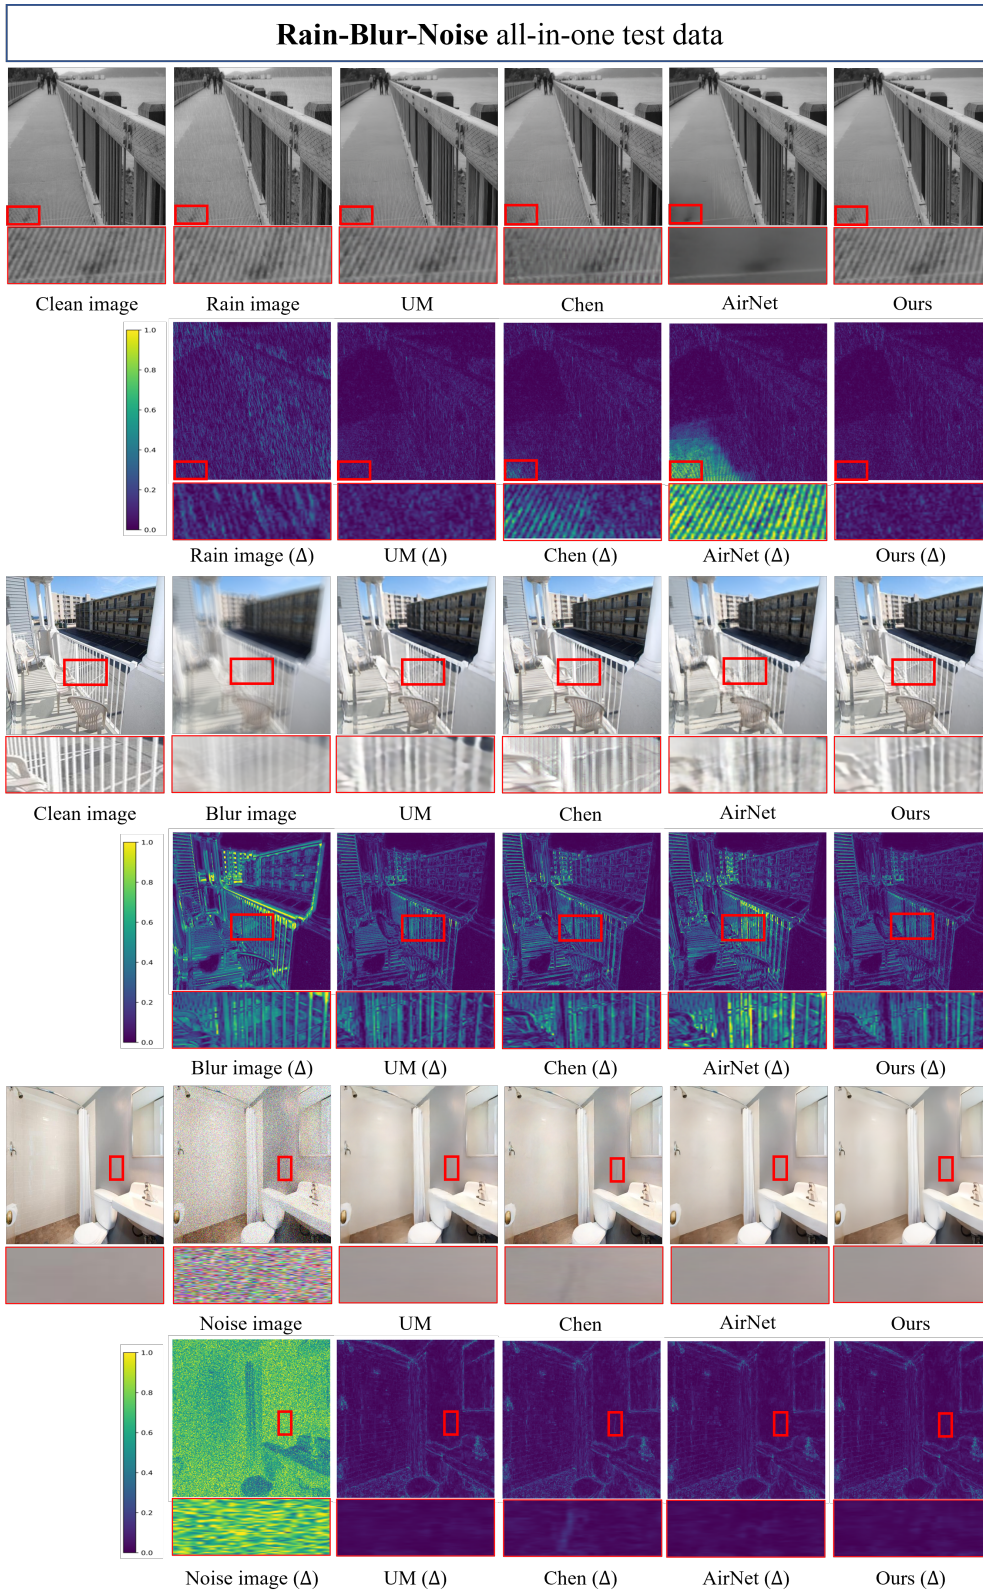

Figure 2. Qualitative results evaluated on the Rain-Blur-Noise test dataset for our proposed method, generic unified model(UM), Chen and AirNet. Our proposed method yielded visually excellent results for the multiple degradations.

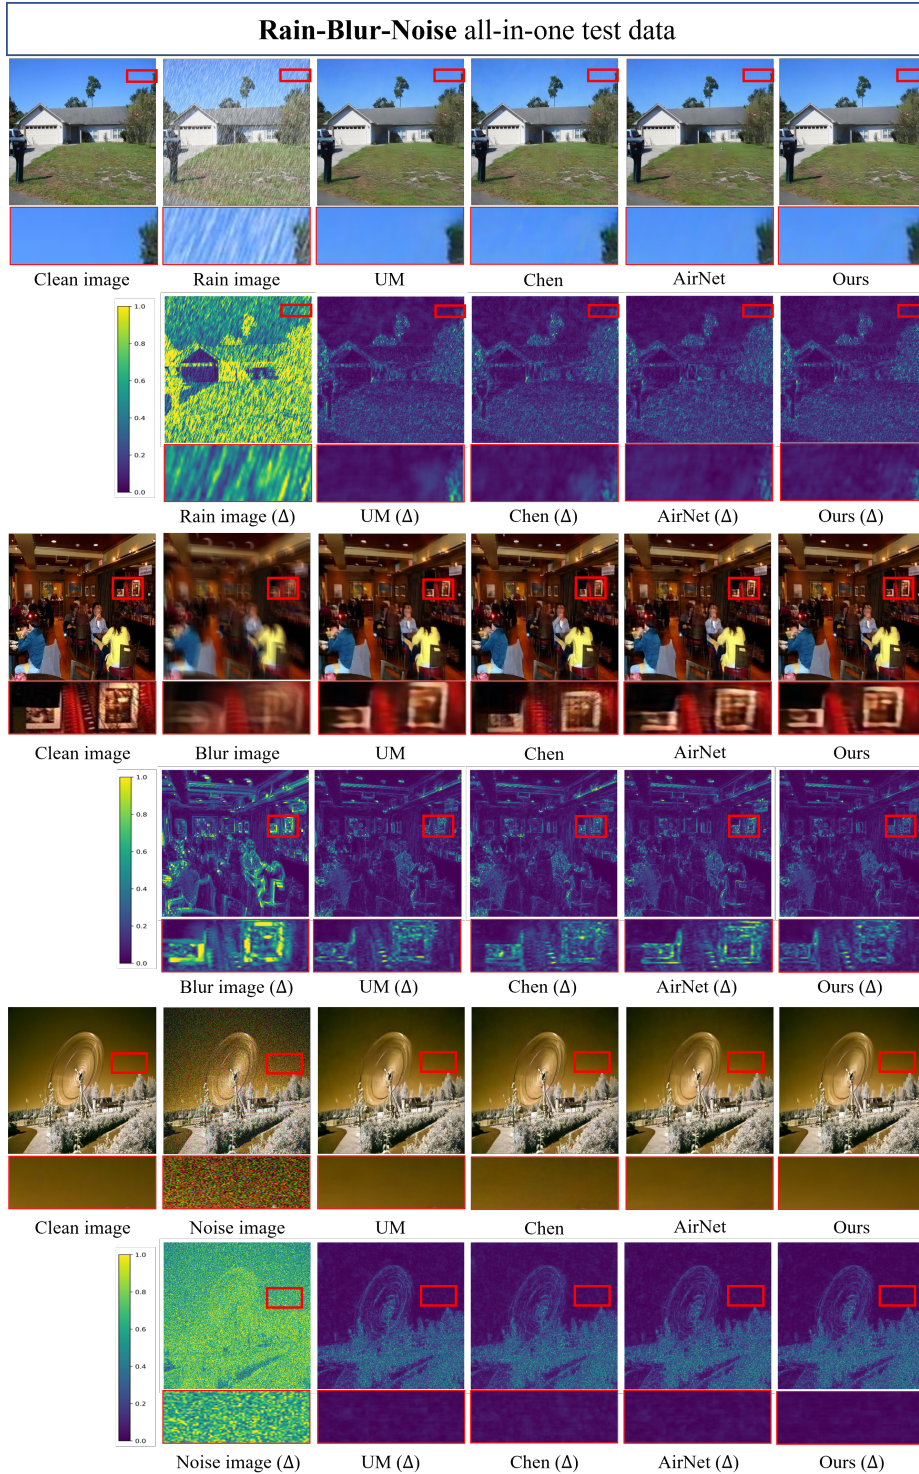

Figure 3. Qualitative results evaluated on the Rain-Blur-Noise test dataset for our proposed method, generic unified model(UM), Chen and AirNet. Our proposed method yielded visually excellent results for the multiple degradations.

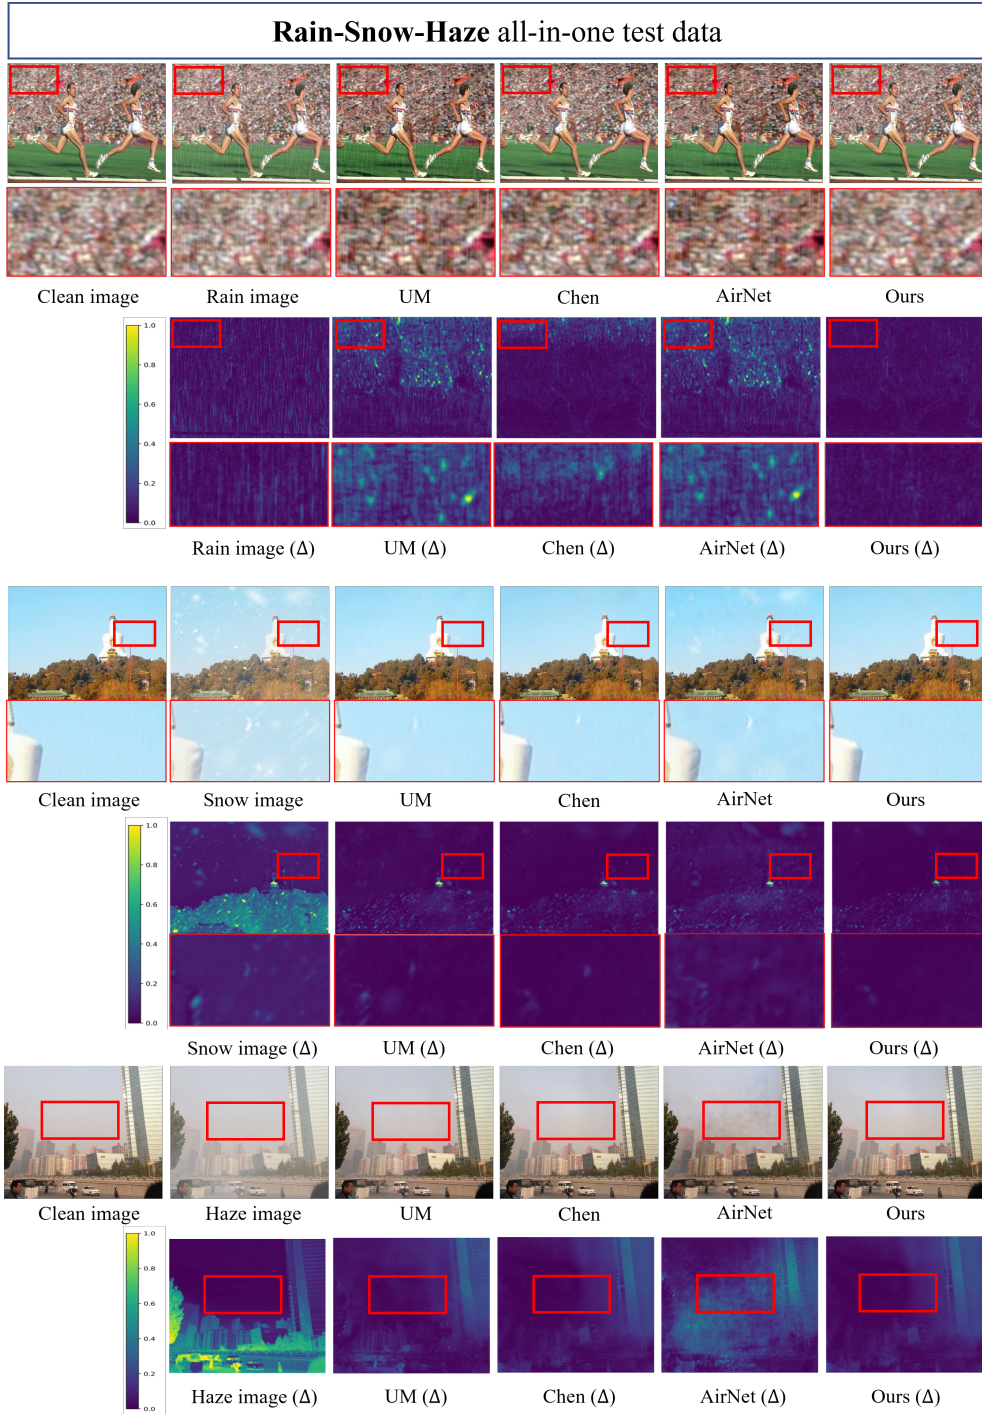

Figure 4. Qualitative results evaluated on the Rain-Snow-Haze test dataset for our proposed method, generic unified model(UM), Chen and AirNet. Our proposed method yielded visually excellent results for the multiple degradations.

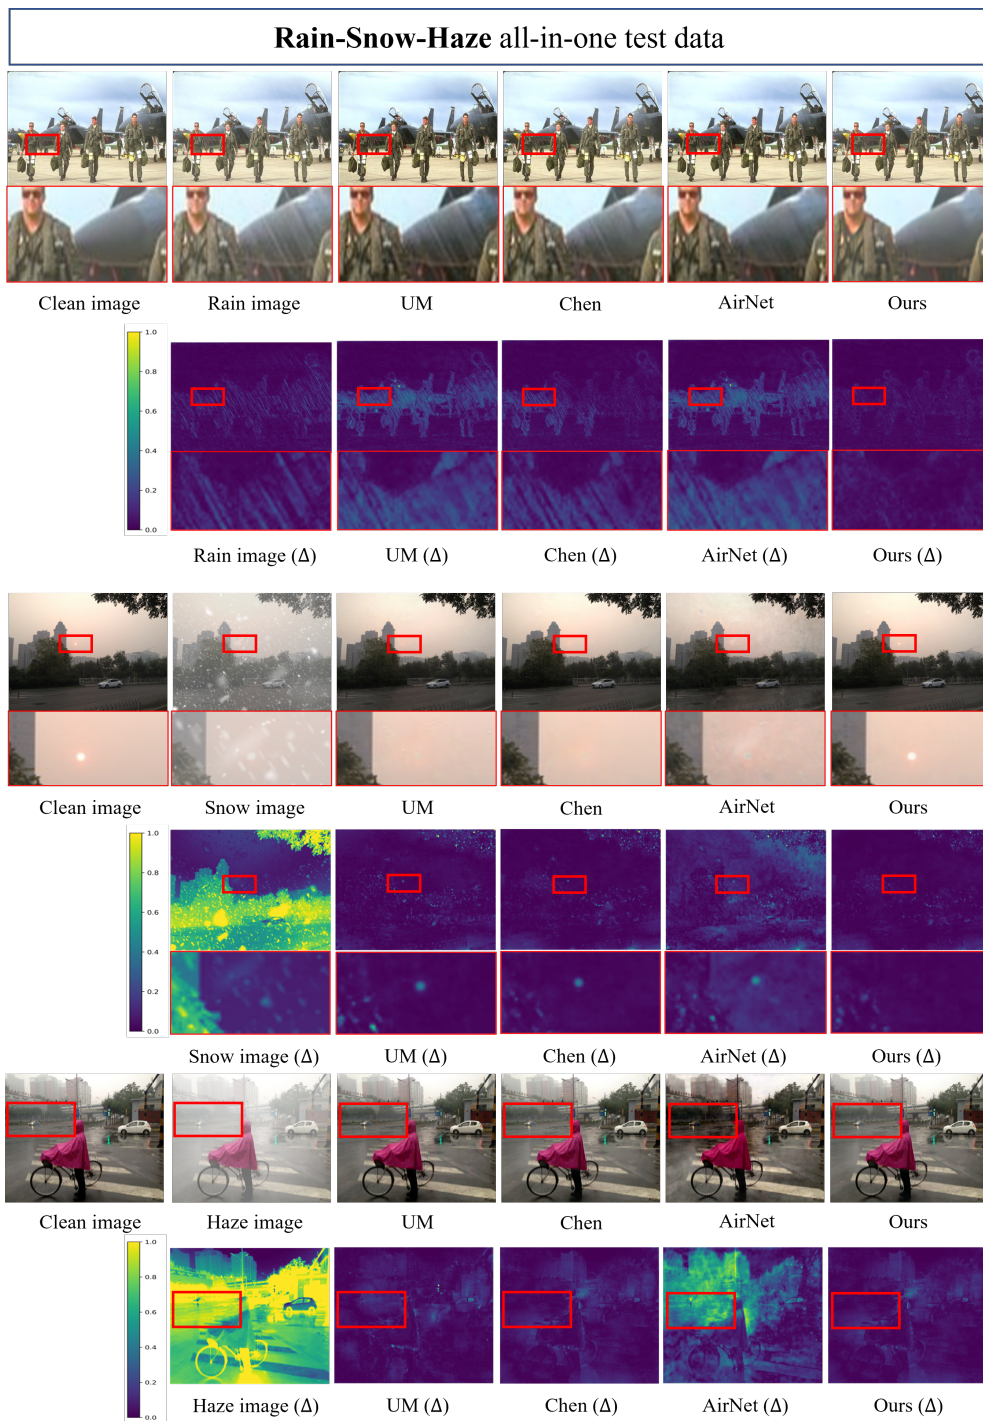

Figure 5. Qualitative results evaluated on the Rain-Snow-Haze test dataset for our proposed method, generic unified model(UM), Chen and AirNet. Our proposed method yielded visually excellent results for the multiple degradations.
